# Supplementary material
Source: PubMed Central journal article supplement (PMC8594857)
Supplement: NIHMS1714155-supplement-Supplementary_Tables.pdf [file NIHMS1714155-supplement-Supplementary_Tables.pdf]

**Supplementary Table 1.** Baseline characteristics of the study participants

| <b>Characteristic</b>                  | <b>N=15</b> |
|----------------------------------------|-------------|
| Age (years), median (range)            | 64 (41-78)  |
| Sex, N (%)                             |             |
| Male                                   | 10 (67)     |
| Female                                 | 5 (33)      |
| Race/Ethnicity, N (%)                  |             |
| White, non-Hispanic                    | 8 (53)      |
| Hispanic                               | 1 (7)       |
| Black                                  | 5 (33)      |
| Asian                                  | 1 (7)       |
| Etiology, N (%)                        |             |
| Hepatitis B                            | 3 (20)      |
| Hepatitis C                            | 4 (27)      |
| Non-viral                              | 8 (53)      |
| NASH/NAFLD                             | 4 (27)      |
| Alcohol                                | 1 (7)       |
| Other or unknown                       | 3 (20)      |
| AFP (ng/mL), N (%)                     |             |
| <400                                   | 10 (67)     |
| ≥400                                   | 5 (33)      |
| ≥20,000                                | 4 (27)      |
| Child-Pugh Score, N (%)                |             |
| A5                                     | 13 (87)     |
| A6                                     | 2 (13)      |
| MELD Score, median (range)             | 7 (6-10)    |
| Diameter of largest lesion (cm), N (%) |             |
| <5                                     | 1 (7)       |
| 5-10                                   | 8 (53)      |
| >10                                    | 6 (40)      |
| Tumor features, N (%)                  |             |
| Multinodular                           | 6 (40)      |
| Portal vein invasion                   | 4 (27)      |
| Infiltrative                           | 9 (60)      |
| Adenopathy                             | 1 (7)       |

**Supplementary Table 2.** Number of individuals with treatment related AEs during the neoadjuvant treatment period. AEs are listed as the most severe treatment-related AE reached for each individual patient from the start of therapy up to 100 after the last dose of treatment.

| <b>Toxicity</b>                            | <b>Grade 1/2</b> | <b>Grade 3/4</b> | <b>Total (N=15)</b> |
|--------------------------------------------|------------------|------------------|---------------------|
| Any                                        | 14               | 2                | 14                  |
| <b>Cardio-renal</b>                        |                  |                  |                     |
| Hypertension                               | 2                | 0                | 2 (13.3%)           |
| Creatinine, elevated                       | 1                | 0                | 1 (6.7%)            |
| <b>Constitutional</b>                      |                  |                  |                     |
| Fatigue                                    | 8                | 0                | 8 (53.3%)           |
| Weight loss                                | 1                | 0                | 1 (6.7%)            |
| <b>Dermatologic</b>                        |                  |                  |                     |
| Palmar-plantar erythrodysesthesia syndrome | 2                | 0                | 2 (13.3%)           |
| Rash                                       | 2                | 0                | 2 (13.3%)           |
| Skin hypopigmentation                      | 1                | 0                | 1 (6.7%)            |
| <b>Ears/Nose/Throat</b>                    |                  |                  |                     |
| Hoarseness                                 | 2                | 0                | 2 (13.3%)           |
| <b>Gastrointestinal</b>                    |                  |                  |                     |
| Abdominal pain                             | 1                | 0                | 1 (6.7%)            |
| Anorexia                                   | 2                | 0                | 2 (13.3%)           |
| Bloating                                   | 1                | 0                | 1 (6.7%)            |
| Diarrhea                                   | 2                | 0                | 2 (13.3%)           |
| Dry mouth                                  | 1                | 0                | 1 (6.7%)            |
| Dysgeusia                                  | 1                | 0                | 1 (6.7%)            |
| Nausea                                     | 5                | 0                | 5 (33.3%)           |
| Oral dysesthesia                           | 1                | 0                | 1 (6.7%)            |
| Mucositis                                  | 1                | 0                | 1 (6.7%)            |
| Vomiting                                   | 3                | 0                | 3 (20.0%)           |
| ALT, elevated                              | 1                | 0                | 1 (6.7%)            |
| Autoimmune Hepatitis                       | 0                | 1                | 1 (6.7%)            |
| <b>Musculoskeletal</b>                     |                  |                  |                     |
| Myositis                                   | 1                | 0                | 1 (6.7%)            |
| <b>Neurological and psychiatric</b>        |                  |                  |                     |
| Insomnia                                   | 1                | 0                | 1 (6.7%)            |
| Myasthenia gravis                          | 0                | 1                | 1 (6.7%)            |

**Supplementary Table 3. Biospecimen Availability/Use**

|    | Timepoint  | Baseline Week 0 | Baseline Week 0 | Baseline Week 0 | Post-Cabo Week 2 | Post-Cabo Week 2 | Post-Cabo Week 2 | Post-Nivo Week 8 |
|----|------------|-----------------|-----------------|-----------------|------------------|------------------|------------------|------------------|------------------|------------------|------------------|------------------|
|    | Specimen   | Core biopsy     | PBMC            | Plasma          | Core biopsy      | PBMC             | Plasma           | FFPE             | FFPE             | TIL              | PBMC             | Plasma           |
|    | Assay      | Nanostring      | CyTOF           | ELISA*          | Nanostring       | CyTOF            | ELISA*           | IMC              | IHC              | CyTOF            | CyTOF            | ELISA*           |
| 1  | Patient 02 | X               | X               |                 | X                | X                | X                | X                | X                | X                | X                | X                |
| 2  | Patient 03 |                 |                 | X               |                  |                  | X                |                  |                  |                  |                  |                  |
| 3  | Patient 04 | X               |                 |                 | X                |                  | X                | X                | X                |                  |                  | X                |
| 4  | Patient 05 | X               |                 | X               | X                |                  | X                |                  |                  |                  |                  |                  |
| 5  | Patient 07 | X               | X               | X               | X                | X                | X                | X                | X                |                  | X                | X                |
| 6  | Patient 08 |                 | X               | X               |                  | X                | X                | X                | X                | X                | X                | X                |
| 7  | Patient 09 |                 | X               | X               |                  | X                | X                | X                | X                | X                | X                | X                |
| 8  | Patient 12 |                 | X               | X               |                  | X                | X                | X                | X                | X                | X                | X                |
| 9  | Patient 13 |                 | X               |                 |                  | X                | X                | X                | X                | X                | X                |                  |
| 10 | Patient 14 |                 | X               | X               |                  |                  | X                | X                | X                | X                | X                | X                |
| 11 | Patient 15 |                 |                 | X               |                  |                  | X                | X                | X                |                  |                  |                  |
| 12 | Patient 17 |                 |                 | X               |                  |                  | X                | X                | X                |                  |                  | X                |
| 13 | Patient 19 |                 | X               | X               |                  |                  | X                |                  |                  |                  | X                | X                |
| 14 | Patient 20 |                 |                 | X               |                  |                  | X                | X                | X                |                  |                  | X                |
| 15 | Patient 21 |                 |                 | X               |                  |                  | X                | X                | X                |                  |                  | X                |

**Supplementary Table 4. CyTOF panel**

| Mass | Metal | Antigen | Surface | Intracellular | Clone     | Titration              | Source    | Custom |
|------|-------|---------|---------|---------------|-----------|------------------------|-----------|--------|
| 89   | Y     | CD45    | x       |               | HI30      | 1:50                   | Fluidigm  |        |
| 113  | In    | CD45    | x       |               | HI30      | 1:100                  | Biolegend | x      |
| 115  | In    | CD45    | x       |               | HI30      | 1:100                  | Biolegend | x      |
| 141  | Pr    | CCR6    | x       |               | G034E3    | 1:66                   | Fluidigm  |        |
| 142  | Ce    | CD19    | x       |               | HIB19     | 1:100                  | Fluidigm  |        |
| 144  | Nd    | CCR5    | x       |               | NP-6G4    | 1:66                   | Fluidigm  |        |
| 145  | Nd    | CD4     | x       |               | RPA-T4    | 1:200                  | Fluidigm  |        |
| 146  | Nd    | CD8     | x       |               | RPA-T8    | 1:200                  | Fluidigm  |        |
| 147  | Sm    | CD7     | x       |               | CD7-6B7   | 1:200                  | Fluidigm  |        |
| 149  | Sm    | CD25    | x       |               | 2A3       | 1:400                  | Fluidigm  |        |
| 150  | Nd    | OX40    | x       |               | ACT35     | 1:100                  | Fluidigm  |        |
| 151  | Eu    | CD2     | x       |               | TS1/8     | 1:400                  | Fluidigm  |        |
| 152  | Sm    | TNFa    |         | x             | Mab11     | 1:200                  | Fluidigm  |        |
| 153  | Eu    | TIM3    | x       |               | F38-2E2   | 1:100                  | Fluidigm  |        |
| 155  | Gd    | PD1     | x       |               | EH12.2H7  | 1:200                  | Fluidigm  |        |
| 158  | Gd    | IL2     |         | x             | MQ1-17H12 | 1:200                  | Fluidigm  |        |
| 159  | Tb    | CCR7    | x       |               | G043H7    | 1:66                   | Fluidigm  |        |
| 160  | Gd    | CD28    | x       |               | CD28.2    | 1:200                  | Fluidigm  |        |
| 161  | Dy    | CTLA4   | x       | x             | 14D3      | 1:200 (S)<br>1:400 (I) | Fluidigm  |        |
| 163  | Dy    | CXCR3   | x       |               | G025H7    | 1:66                   | Fluidigm  |        |
| 165  | Ho    | CD45RO  | x       |               | UCHL1     | 1:100                  | Fluidigm  |        |
| 167  | Er    | CD27    | x       |               | O323      | 1:200                  | Fluidigm  |        |
| 168  | Er    | IFNg    |         | x             | B27       | 1:100                  | Fluidigm  |        |
| 169  | Tm    | CD45RA  | x       |               | HI100     | 1:400                  | Fluidigm  |        |
| 170  | Er    | CD3     | x       |               | UCHT1     | 1:200                  | Fluidigm  |        |
| 171  | Yb    | GZMB    |         | x             | GB11      | 1:100                  | Fluidigm  |        |
| 172  | Yb    | Ki67    |         | x             | B56       | 1:100                  | Fluidigm  |        |
| 173  | Yb    | 41BB    | x       |               | 4B4-1     | 1:200                  | Fluidigm  |        |
| 175  | Lu    | LAG3    | x       |               | 11C3C65   | 1:100                  | Fluidigm  |        |
| 176  | Yb    | CD127   | x       |               | A019D5    | 1:100                  | Fluidigm  |        |
| 194  | Pt    | CD45    | x       |               | HI30      | 1:50                   | Biolegend | x      |
| 198  | Pt    | CD45    | x       |               | HI30      | 1:50                   | Biolegend | x      |

**Supplementary Table 5. IMC panel**

| Mass | Metal | Antigen             | Clone       | Conc.<br>( $\mu\text{g/ml}$ ) | Source   | Custom |
|------|-------|---------------------|-------------|-------------------------------|----------|--------|
| 141  | Pr    | Smooth muscle actin | 1A4         | 1.25                          | Fluidigm |        |
| 143  | Nd    | Vimentin            | D21H3       | 1.67                          | Fluidigm |        |
| 146  | Nd    | CD16                | EPR16784    | 5                             | Fluidigm |        |
| 147  | Sm    | CD163               | EDHu-1      | 5                             | Fluidigm |        |
| 148  | Nd    | Pan-keratin         | C11         | 2.5                           | Fluidigm |        |
| 149  | Sm    | CD15                | W6D3        | 10                            | Fluidigm |        |
| 150  | Nd    | PD-L1               | SP142       | 10                            | Fluidigm |        |
| 152  | Sm    | CD45                | 2B11        | 5                             | Fluidigm |        |
| 153  | Eu    | Lag3                | D2G40       | 10                            | Fluidigm |        |
| 155  | Gd    | FoxP3               | 236A/E7     | 10                            | Fluidigm |        |
| 156  | Gd    | CD4                 | ERP6855     | 5                             | Fluidigm |        |
| 158  | Gd    | E-cadherin          | 24E10       | 5                             | Fluidigm |        |
| 159  | Tb    | CD68                | KP1         | 10                            | Fluidigm |        |
| 160  | Gd    | CD28                | EPR22076    | 10                            | Abcam    | x      |
| 161  | Dy    | CD20                | H1          | 5                             | Fluidigm |        |
| 162  | Dy    | CD8a                | C8/144B     | 2.5                           | Fluidigm |        |
| 163  | Dy    | CCR6                | Polyclonal  | 5                             | Fluidigm |        |
| 164  | Dy    | Arginase 1          | D4E3M       | 10                            | Fluidigm |        |
| 167  | Er    | Granzyme B          | EPR20129-17 | 5                             | Fluidigm |        |
| 168  | Er    | Ki-67               | B56         | 2.5                           | Fluidigm |        |
| 169  | Tm    | Collagen type I     | Polyclonal  | 1.25                          | Fluidigm |        |
| 170  | Er    | CD3                 | Polyclonal  | 5                             | Fluidigm |        |
| 172  | Yb    | Cl. Caspase 3       | 5A1E        | 10                            | Fluidigm |        |
| 173  | Yb    | CD45RO              | UCHL1       | 2.5                           | Fluidigm |        |
| 174  | Yb    | HLADR               | LN3         | 5                             | Fluidigm |        |
| 176  | Yb    | Histone H3          | D1H2        | 1.25                          | Fluidigm |        |
| 191  | Ir    | DNA 1               |             |                               | Fluidigm |        |
| 193  | Ir    | DNA 2               |             |                               | Fluidigm |        |
| 195  | Pt    | Plasma Membrane 2   |             |                               | Fluidigm |        |
| 196  | Pt    | Plasma Membrane 3   |             |                               | Fluidigm |        |
| 198  | Pt    | Plasma Membrane 4   |             |                               | Fluidigm |        |

**Supplementary Table 6.** IHC Staining procedures for CD3, CD8, CD20, CD138, and IgA

| Antibody | Clone    | Source          | Antigen retrieval condition | Antibody final concentration( $\mu\text{g/ml}$ ) | Antibody incubation time |
|----------|----------|-----------------|-----------------------------|--------------------------------------------------|--------------------------|
| CD3      | LN10     | Cell Marque     | Citrate buffer, pH 6.0      | 12.4                                             | 30min                    |
| CD8      | 4B11     | Cell Marque     | EDTA buffer, pH 9.0         | 19.2                                             | 15min                    |
| CD20     | L26      | LeicaBiosystems | EDTA buffer, pH 6.0         | 6.2                                              | 15min                    |
| CD138    | MI15     | Agilent         | Citrate buffer, pH 6.0      | 0.1                                              | 30min                    |
| CD20     | L26      | LeicaBiosystems | Citrate buffer, pH6.0       | 0.38                                             | 30min                    |
| IgA      | IgA-L-CE | LeicaBiosystems |                             | 0.046                                            | 30min                    |
